# Supplementary material
Source: publisher site journal article supplement (https://subtbiol.pensoft.net/article/79993/download/suppl/31/)
Supplement: Supplementary file 1

**Supplemental Table 1.** Genbank sequences included in the 16S and CO1 phylogenetic analyses.

| **Species** | **16S** | **CO1** |
| --- | --- | --- |
| *Astacus astacus* | AF235983 | AF517104 |
| *Cambarus acanthura* | JX514560 | JX514480 |
| *Cambarus aculabrum* | JX514529 | JX514482 |
| *Cambarus bartonii* | JX514501 | JX514435 |
| *Cambarus causeyi* |  | JX514477 |
| *Cambarus coosae* | JX514551 | JX514485 |
| *Cambarus cracens* | JX514522 | JX514443 |
| *Cambarus cryptodytes* | JX514534 | DQ113444 |
| *Cambarus diogenes* | JX514543 | JX514467 |
| *Cambarus gentryi* |  | DQ411785 |
| *Cambarus graysoni* | JX514506 | JX514438 |
| *Cambarus hamulatus* | DQ411734 | DQ411760 |
|  | DQ411735 | DQ411761 |
|  | DQ411736 | DQ411762 |
|  | DQ411737 | DQ411763 |
|  | DQ411738 | DQ411764 |
|  | DQ411739 | DQ411764 |
|  | DQ411740 | DQ411765 |
|  | DQ411741 | DQ411766 |
|  | DQ411742 | DQ411767 |
|  | DQ411743 | DQ411768 |
|  | DQ411743 | DQ411768 |
|  | DQ411744 | DQ411769 |
|  | DQ411745 | DQ411770 |
|  |  | DQ411771 |
|  |  | DQ411772 |
|  |  | DQ411773 |
|  |  | DQ411774 |
|  |  | DQ411775 |
|  |  | DQ411776 |
| *Cambarus harti* | JX514508 | JX514440 |
| *Cambarus howardi* | JX514502 | JX514494 |
| *Cambarus hubbsi* | JX514518 | JX514446 |
| *Cambarus hubrichti* | JX514519 | MK492378 |
| *Cambarus jonesi* | DQ411746 | DQ411777 |
|  | DQ411747 | DQ411778 |
|  | DQ411748 | DQ411779 |
|  | DQ411749 |  |
|  | DQ411750 |  |
|  | DQ411751 |  |
|  | DQ411752 |  |
|  | DQ411752 |  |
|  | DQ411753 |  |
|  | EU433903 |  |
|  | EU433904 |  |
| *Cambarus laconensis* | DQ411754 | DQ411782 |
|  | DQ411755 |  |
|  | DQ411756 |  |
|  | EU433905 |  |
|  | EU433906 |  |
|  | EU433907 |  |
|  | EU433908 |  |
| *Cambarus ludovicianus* | JX514549 | JX514475 |
| *Cambarus nerterius* | JX514555 |  |
| *Cambarus obstipus* | JX514510 | JX514438 |
| *Cambarus pecki* |  | JX514434 |
| *Cambarus pristinus* | JX514561 | JX514451 |
| *Cambarus scotti* | JX514559 | JX514500 |
| *Cambarus setosus* | JX514539 | MN984897 |
| *Cambarus speleocoopi* | DQ411757 | DQ411780 |
|  | DQ411758 | DQ411781 |
|  | DQ411758 | DQ411781 |
|  | DQ411759 |  |
|  | EU433909 |  |
|  | EU433910 |  |
| *Cambarus subterraneus* |  | MN984905 |
| *Cambarus tartarus* | JX514540 | MN984911 |
| *Cambarus tenebrosus* | JX514521 | JX514444 |
| *Cambarus zophonastes* |  | MN984914 |
| *Fallicambarus fodiens* | JX514562 | JX514452 |
| *Faxonius neglectus* | JX514564 | JX514455 |
| *Faxonius stygocaneyi* | KX237986 | MT012509 |
| *Orconectes australis* | AY853625 | EU583504 |
|  | AY853632 | EU583506 |
|  | AY853634 | EU583518 |
|  | AY853649 | EU583527 |
|  | AY853650 | EU583532 |
|  | AY853651 | EU583547 |
|  | AY853652 | EU583548 |
|  | AY853654 | EU583550 |
|  | AY853655 | EU583551 |
|  | AY853655 |  |
|  | AY853659 |  |
|  | AY853659 |  |
|  | AY853659 |  |
|  | AY853659 |  |
|  | AY853659 |  |
|  | AY853660 |  |
|  | AY853661 |  |
|  | AY853662 |  |
|  | AY853663 |  |
| *Orconectes barri* | AY853615 | EU583562 |
|  | AY853617 | EU583571 |
| *Orconectes incomptus* | AY853611 | EU583561 |
|  | AY853612 |  |
|  | AY853613 |  |
|  | AY853614 |  |
| *Orconectes inermis* | KX237959 | AY701201 |
| *Orconectes packardi* | AY853596 | EU583552 |
|  | AY853603 | EU583560 |
| *Orconectes pellucidus* | EU433914 | AY701203 |
| *Pacifastacus leniusculus* | AF235985 | EU921148 |
| *Procambarus acherontis* | KX237994 | KX238171 |
| *Procambarus attiguus* | KX238001 | KX238178 |
| *Procambarus clarkii* | AF235990 | AY701195 |
| *Procambarus erythrops* | KX238021 | KX238188 |
| *Procambarus franzi* | KX238024 | KX238191 |
| *Procambarus horsti* | KX238032 | KX238194 |
| *Procambarus leitheuseri* | KX238040 | KX238200 |
| *Procambarus lucifugus alachua* | KX238045 | KX238205 |
| *Procambarus lucifugus lucifugus* | KX238044 | KX238204 |
| *Procambarus milleri* | KX238049 | KX238209 |
| *Procambarus orcinus* | KX238054 | KX238215 |
| *Procambarus pallidus* | KX238055 | KX238216 |
| *Troglocambarus maclanei* |  | KF827975 |
